# Supplementary material for: Radiomic prediction models for the level of Ki-67 and p53 in glioma
Source: PubMed Central journal article supplement — J Int Med Res. 2020 May 20;48(5):0300060520914466. doi: 10.1177/0300060520914466 (PMC7241212; doi:10.1177/0300060520914466), 2020-05-20
Supplement: sj-pdf-1-imr-10.1177_0300060520914466.pdf [file sj-pdf-1-imr-10.1177_0300060520914466.pdf]

## Appendix

### 1. Ki-67 model

#### 1.1 For T2 solid

5 features are retained:

[1] "Correlation\_angle135\_offset7"

[2] "LongRunEmphasis\_angle0\_offset1"

[3] "ShortRunLowGreyLevelEmphasis\_angle135\_offset1"

[4] "ShortRunEmphasis\_angle135\_offset4"

[5] "LongRunEmphasis\_angle135\_offset4"

| Type of measure | Name                                          | Formula                                                                                |
|-----------------|-----------------------------------------------|----------------------------------------------------------------------------------------|
| GLCM Parameters | Correlation_angle135_offset7"                 | $-\sum_{i,j} \frac{(i-\mu)(j-\mu)g(i,j)}{\sigma^2}$                                    |
| RLM Parameters  | LongRunEmphasis_angle0_offset1                | $LRE(\theta) = \frac{1}{n_r} \sum_{i=1}^M \sum_{j=1}^N p(i,j,\theta)j^2$               |
| RLM Parameters  | ShortRunLowGreyLevelEmphasis_angle135_offset1 | $SRLGE(\theta) = \frac{1}{n_r} \sum_{j=1}^N \sum_{i=1}^M \frac{p(i,j,\theta)}{i^2j^2}$ |
| RLM Parameters  | ShortRunEmphasis_angle135_offset4             | $SRE(\theta) = \frac{1}{n_r} \sum_{i=1}^M \sum_{j=1}^N \frac{p(i,j,\theta)}{j^2}$      |
| RLM Parameters  | LongRunEmphasis_angle135_offset4              | $LRE(\theta) = \frac{1}{n_r} \sum_{i=1}^M \sum_{j=1}^N p(i,j,\theta)j^2$               |

| Features                                                | Test           | Train            | p-value |
|---------------------------------------------------------|----------------|------------------|---------|
| Correlation_angle135_offset7: mean(SD)                  | -0.084 (1.031) | 3E-7 (1.000)     | 0.777   |
| LongRunEmphasis_angle0_offset1: mean(SD)                | -0.326 (0.819) | 2E-7 (1.000)     | 0.245   |
| ShortRunLowGreyLevelEmphasis_angle135_offset1: mean(SD) | 0.397(1.600)   | -1E-7<br>(1.000) | 0.266   |
| ShortRunEmphasis_angle135_offset4: mean(SD)             | 0.196(1.001)   | 2E-7 (1.000)     | 0.504   |
| LongRunEmphasis_angle135_offset4: mean(SD)              | -0.176(0.141)  | 1E-7 (1.000)     | 0.474   |

## 1.2 For T2 peritumoral areas in 20mm

5 features are retained:

[1] "GLCMEntropy\_AllDirection\_offset1\_SD"

[2] "InverseDifferenceMoment\_angle0\_offset1"

[3] "LowGreyLevelRunEmphasis\_AllDirection\_offset1\_SD"

[4] "ShortRunEmphasis\_AllDirection\_offset4\_SD"

[5] "ShortRunEmphasis\_AllDirection\_offset7\_SD"

| Type of measure | Name                                            | Formula                                                                            |
|-----------------|-------------------------------------------------|------------------------------------------------------------------------------------|
| GLCM Parameters | GLCMEntropy_AllDirection_offset1_SD             | $-\sum_{i,j} g(i,j) \log_2(i,j)$                                                   |
| GLCM Parameters | InverseDifferenceMoment_angle0_offset1          | $\sum \sum \frac{1}{1+(i-j)^2} g(i,j)$                                             |
| RLM Parameters  | LowGreyLevelRunEmphasis_AllDirection_offset1_SD | $LGRE(\theta) = \frac{1}{n_r} \sum_{j=1}^N \sum_{i=1}^M \frac{p(i,j,\theta)}{i^2}$ |
| RLM Parameters  | ShortRunEmphasis_AllDirection_offset4_SD        | $SRE(\theta) = \frac{1}{n_r} \sum_{i=1}^M \sum_{j=1}^N \frac{p(i,j,\theta)}{j^2}$  |
| RLM Parameters  | ShortRunEmphasis_AllDirection_offset7_SD        | $SRE(\theta) = \frac{1}{n_r} \sum_{i=1}^M \sum_{j=1}^N \frac{p(i,j,\theta)}{j^2}$  |

| Features                                                  | Test          | Train         | <i>p</i> -value |
|-----------------------------------------------------------|---------------|---------------|-----------------|
| GLCMEntropy_AllDirection_offset1_SD: mean(SD)             | -0.109(1.074) | -4E-7(1.000)  | 0.715           |
| InverseDifferenceMoment_angle0_offset1: mean(SD)          | -0.039(0.806) | -4E-7(1.000)  | 0.888           |
| LowGreyLevelRunEmphasis_AllDirection_offset1_SD: mean(SD) | -0.140(0.087) | -4E-7(1.000)  | 0.396           |
| ShortRunEmphasis_AllDirection_offset4_SD: mean(SD)        | -0.089(1.014) | -0.090(0.843) | 0.997           |
| ShortRunEmphasis_AllDirection_offset7_SD: mean(SD)        | 0.014(0.758)  | -2E-7(1.000)  | 0.958           |

### 1.3 For T1 solid

3 features are retained:

[1] "LongRunEmphasis\_angle45\_offset1"

[2] "LongRunLowGreyLevelEmphasis\_AllDirection\_offset7\_"

[3] "ShortRunEmphasis\_AllDirection\_offset7\_SD"

| Type of measure | Name                                             | Formula                                                                                   |
|-----------------|--------------------------------------------------|-------------------------------------------------------------------------------------------|
| RLM Parameters  | LongRunEmphasis_angle45_offset1                  | $LRE(\theta) = \frac{1}{n_r} \sum_{i=1}^M \sum_{j=1}^N p(i, j, \theta) j^2$               |
| RLM Parameters  | LongRunLowGreyLevelEmphasis_AllDirection_offset7 | $LRLGE(\theta) = \frac{1}{n_r} \sum_{j=1}^N \sum_{i=1}^M \frac{p(i, j, \theta)}{i^2 j^2}$ |
| RLM Parameters  | ShortRunEmphasis_AllDirection_offset7_SD         | $SRE(\theta) = \frac{1}{n_r} \sum_{i=1}^M \sum_{j=1}^N \frac{p(i, j, \theta)}{j^2}$       |

| features                                                      | Test           | Train          | <i>p</i> -value |
|---------------------------------------------------------------|----------------|----------------|-----------------|
| LongRunEmphasis_angle45_offset1: mean(SD)                     | 0.533 (0.859)  | 1E-7 (1.000)   | 0.851           |
| LongRunLowGreyLevelEmphasis_AllDirection_offset7_SD: mean(SD) | 0.602 (1.245)  | -1E-7 (1.000)  | 0.065           |
| ShortRunEmphasis_AllDirection_offset7_SD: mean(SD)            | -0.395 (0.420) | -0.171 (0.716) | 0.297           |

## 2. p53 model :

## 2.1 For T2 peritumoral areas in 10 mm

7 features are retained:

[1] "Percentile30"

[2] "uniformity"

[3] "GLCMEnergy\_angle135\_offset4"

[4] "Inertia\_angle0\_offset1"

[5] "SurfaceVolumeRatio"

[6] "LongRunEmphasis\_AllDirection\_offset4\_SD"

[7] "LongRunEmphasis\_angle135\_offset1"

| Type of measure               | Name                                    | Formula                                                                        |
|-------------------------------|-----------------------------------------|--------------------------------------------------------------------------------|
| <b>Histogram Parameters</b>   | Percentile30                            | $n = \frac{P}{100} * N$                                                        |
| <b>Histogram Parameters</b>   | uniformity                              | $Uniformity = \sum_{i=1}^{N_i} p(i)^2$                                         |
| <b>GLCM Parameters</b>        | GLCMEnergy_angle135_offset4             | $-\sum_{i,j} g(i,j) \log_2(g(i,j))$                                            |
| <b>Texture Parameters</b>     | Inertia_angle0_offset1                  | $\sum_{i,j} ((i-j)^2 g(i,j))$                                                  |
| <b>Form Factor Parameters</b> | SurfaceVolumeRatio                      | Surface to volume ratio = $\frac{A}{V}$                                        |
| <b>RLM Parameters</b>         | LongRunEmphasis_AllDirection_offset4_SD | $LRE(\theta)$<br>$= \frac{1}{n_r} \sum_{i=1}^M \sum_{j=1}^N p(i,j,\theta) j^2$ |
| <b>RLM Parameters</b>         | LongRunEmphasis_angle135_offset1        | $LRE(\theta)$<br>$= \frac{1}{n_r} \sum_{i=1}^M \sum_{j=1}^N p(i,j,\theta) j^2$ |

| Features                                          | Test           | Train         | <i>p</i> -value |
|---------------------------------------------------|----------------|---------------|-----------------|
| Percentile30: mean(SD)                            | 0.146 (0.814)  | -3E-7 (1.000) | 0.611           |
| uniformity: mean(SD)                              | -0.169 (0.783) | -1E-7 (1.000) | 0.553           |
| GLCMEnergy_angle135_offset4: mean(SD)             | -0.141(0.929)  | 0E-7(1.000)   | 0.635           |
| Inertia_angle0_offset1: mean(SD)                  | -0.207(0.355)  | 0E-7(1.000)   | 0.282           |
| SurfaceVolumeRatio: mean(SD)                      | 0.327(1.072)   | 0E-7(1.000)   | 0.294           |
| LongRunEmphasis_AllDirection_offset4_SD: mean(SD) | -0.131(0.150)  | 0E-7(1.000)   | 0.604           |
| LongRunEmphasis_angle135_offset1: mean(SD)        | -0.254(0.241)  | 0E-7(1.000)   | 0.322           |

## 2.2 For T1 solid

10 features are retained:

- [1] "histogramEnergy"
- [2] "Correlation\_AllDirection\_offset1"
- [3] "Correlation\_angle90\_offset7"
- [4] "InverseDifferenceMoment\_AllDirection\_offset7"
- [5] "InverseDifferenceMoment\_AllDirection\_offset7\_SD"
- [6] "ShortRunEmphasis\_AllDirection\_offset7\_SD"
- [7] "InverseDifferenceMoment\_angle45\_offset7"
- [8] "ShortRunEmphasis\_angle0\_offset1"
- [9] "GLCMEnergy\_AllDirection\_offset1\_SD"
- [10] "HaralickCorrelation\_AllDirection\_offset1"

| Type of measure      | Name                                            | Formula                                                                           |
|----------------------|-------------------------------------------------|-----------------------------------------------------------------------------------|
| Histogram Parameters | histogramEnergy                                 | $energy = \sum_i^N X(i)^2$                                                        |
| Texture Parameters   | Correlation_AllDirection_offset1                | $-\sum_{i,j} \frac{(i-\mu)(j-\mu)g(i,j)}{\sigma^2}$                               |
| Texture Parameters   | Correlation_angle90_offset7                     | $-\sum_{i,j} \frac{(i-\mu)(j-\mu)g(i,j)}{\sigma^2}$                               |
| GLCM Parameters      | InverseDifferenceMoment_AllDirection_offset7    | $\sum \sum \frac{1}{1+(i-j)^2} g(i,j)$                                            |
| GLCM Parameters      | InverseDifferenceMoment_AllDirection_offset7_SD | $\sum \sum \frac{1}{1+(i-j)^2} g(i,j)$                                            |
| RLM Parameters       | ShortRunEmphasis_AllDirection_offset7_SD        | $SRE(\theta) = \frac{1}{n_r} \sum_{i=1}^M \sum_{j=1}^N \frac{p(i,j,\theta)}{j^2}$ |
| GLCM Parameters      | InverseDifferenceMoment_angle45_offset7         | $\sum \sum \frac{1}{1+(i-j)^2} g(i,j)$                                            |
| RLM Parameters       | ShortRunEmphasis_angle0_offset1                 | $SRE(\theta) = \frac{1}{n_r} \sum_{i=1}^M \sum_{j=1}^N \frac{p(i,j,\theta)}{j^2}$ |
| GLCM Parameters      | GLCMEnergy_AllDirection_offset1_SD              | $\sum_{i,j} g(i,j)^2$                                                             |
| GLCM Parameters      | HaralickCorrelation_AllDirection_offset1        | $-\sum_{i,j} \frac{(i,j)g(i,j) - \mu_i^2}{\sigma_i^2}$                            |

| Features | Test | Train | p-value |
|----------|------|-------|---------|
|----------|------|-------|---------|

---

|                                                                    |                |                |       |
|--------------------------------------------------------------------|----------------|----------------|-------|
| <b>histogramEnergy : mean (SD)</b>                                 | 0.174 (1.238)  | 1E-7 (1.000)   | 0.600 |
| <b>Correlation_AllDirection_offset1 : mean (SD)</b>                | 0.117 (0.895)  | -0.112 (0.778) | 0.365 |
| <b>Correlation_angle90_offset7 : mean (SD)</b>                     | 0.141 (0.877)  | -0.116 (0.756) | 0.298 |
| <b>InverseDifferenceMoment_AllDirection_offset7 : mean (SD)</b>    | -0.188 (0.858) | 1E-7 (1.000)   | 0.522 |
| <b>InverseDifferenceMoment_AllDirection_offset7_SD : mean (SD)</b> | -0.038 (0.765) | -3E-7 (1.000)  | 0.895 |
| <b>ShortRunEmphasis_AllDirection_offset7_SD : mean (SD)</b>        | 0.112 (0.880)  | -5E-7 (1.000)  | 0.704 |
| <b>InverseDifferenceMoment_angle45_offset7 : mean (SD)</b>         | 0.225 (0.909)  | -2E-7 (1.000)  | 0.450 |
| <b>ShortRunEmphasis_angle0_offset1 : mean (SD)</b>                 | 0.254 (1.032)  | 2E-7 (1.000)   | 0.413 |
| <b>GLCMEnergy_AllDirection_offset1_SD : mean (SD)</b>              | 0.063 (0.651)  | -2E-7 (1.000)  | 0.820 |
| <b>HaralickCorrelation_AllDirection_offset1 : mean (SD)</b>        | 0.117 (0.895)  | 1E-7 (1.000)   | 0694  |

---
